# Supplementary material
Source: PubMed Central journal article supplement (PMC6082426)

# Pre-module survey

Please answer the following to the best of your ability without referencing any resources.

\* Required

1. **Research ID \***

(4 digit number given to you at the beginning of the trial)

---

## 1. In the treatment of a patient with cancer, radiation oncologists:

---

2. **Perform history and physical exam (H&P) \***

Mark only one oval.

Yes

No

3. **Stage the patient \***

Mark only one oval.

Yes

No

4. **Review diagnostic imaging \***

Mark only one oval.

Yes

No

5. **Design radiation therapy (RT) plan \***

Mark only one oval.

Yes

No

6. **Push a button to deliver radiation therapy (RT) everyday \***

Mark only one oval.

Yes

No

**7. Follow-up with patient after treatment \***

Mark only one oval.

- Yes  
 No

**8. Radiation therapy is ALMOST ALWAYS used for palliation (i.e. to improve symptoms but not cure). \***

Mark only one oval.

- Yes  
 No

**9. Which of the following are approved for the prevention/early detection of invasive cervical cancer? Check ALL that apply. \***

Check all that apply.

- a) Urine test  
 b) Rectal exam  
 c) Pap smear  
 d) Annual pelvic CT scans  
 e) Vaccination

**10. What was the incidence of cervical cancer in women in the United States in 2015? \***

Mark only one oval.

- a) 1 in 10  
 b) 1 in 150  
 c) 1 in 1,500  
 d) 1 in 15,000

**11. How confident are you with understanding the patient's experience of radiation therapy (from the perspective of a general physician)? \***

Mark only one oval.

- Not at all confident  
 Slightly confident  
 Moderately confident  
 Quite confident  
 Extremely confident

12. **6. How confident are you with identifying structures in the female pelvis on a CT scan? \***

*Mark only one oval.*

- Not at all confident
- Slightly confident
- Moderately confident
- Quite confident
- Extremely confident

**Thank you! Now please refer back to your directions/study coordinator for the next task.**

---

Powered by

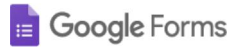

Supplement: NIHMS953259-supplement-3.pdf [file NIHMS953259-supplement-3.pdf]
